# Supplementary material for: Sensitivity of spatial aerosol particle distributions to the boundaryconditions in the PALM model system 6.0
Source: Copernicus journal article supplement (doi:10.5194/gmd-2020-163), 2020-06-08
Supplement: Supplementary file [file gmd-2020-163-AC2-supplement.zip]

**Contents**

|    |                                                                                       |           |
|----|---------------------------------------------------------------------------------------|-----------|
|    | <b>S2 Measurements</b>                                                                | <b>2</b>  |
|    | <b>S3 Simulations</b>                                                                 | <b>3</b>  |
|    | S3.1 Model description . . . . .                                                      | 3         |
| 5  | S3.4 Air pollutant background concentrations . . . . .                                | 4         |
|    | S3.4.1 9 Jun 2017 . . . . .                                                           | 5         |
|    | S3.4.2 12 Dec 2017 . . . . .                                                          | 6         |
|    | S3.5 Air pollutant emissions . . . . .                                                | 7         |
|    | <b>S4 Comparison of the modelled and observed boundary conditions</b>                 | <b>7</b>  |
| 10 | <b>S5 Evaluation of the air quality modelling results</b>                             | <b>12</b> |
|    | S5.2 Horizontal distribution of total aerosol particle number concentration . . . . . | 12        |
|    | S5.4 Aerosol size distribution . . . . .                                              | 13        |
|    | S5.5 Aerosol chemical composition . . . . .                                           | 20        |
|    | <b>S6 Sensitivity analysis</b>                                                        | <b>22</b> |

S2 Measurements

**Table S1.** Instrumentation. Abbreviations: PSD = aerosol particle size distribution, BC = black carbon, PM<sub>2.5</sub> = particulate matter with aerodynamic diameter < 2.5 µm, LDSA = lung-deposited surface area.

| Site      | Variable                                                                                                                                  | Instrument                                                                                                        |
|-----------|-------------------------------------------------------------------------------------------------------------------------------------------|-------------------------------------------------------------------------------------------------------------------|
| Supersite | PSD (size range 6–800 nm)                                                                                                                 | Differential mobility particle sizer (DMPS: A20 CPC, Airmodus & Vienna-type Differential Mobility Analyzer (DMA)) |
|           | Aerosol chemical composition (SO <sub>4</sub> <sup>-</sup> , OC, NO <sub>3</sub> <sup>-</sup> , NH <sub>4</sub> <sup>+</sup> , 40–600 nm) | Aerosol Chemical Speciation Monitor (ACSM, Aerodyne Research)                                                     |
|           | BC (< 1 µm)                                                                                                                               | Multi-angle Absorption Photometer (MAAP 5012, Thermo Scientific Inc.)                                             |
|           | PM <sub>2.5</sub>                                                                                                                         | Tapered element oscillating microbalance (TEOM 1405, Thermo Scientific Inc.)                                      |
| SMEAR III | PSD (6–800 nm)                                                                                                                            | Differential mobility particle sizer (DMPS: A20 CPC, Airmodus & Vienna-type Differential Mobility Analyzer (DMA)) |
|           | LDSA                                                                                                                                      | AQ Urban (Pegasor Oy)                                                                                             |
|           | Wind speed and direction                                                                                                                  | 3D ultrasonic anemometer (Metek USA-1, Metek GmbH)                                                                |
|           | Air temperature                                                                                                                           | 3D ultrasonic anemometer (Metek USA-1, Metek GmbH)                                                                |
| Kallio    | LDSA                                                                                                                                      | AQ Urban (Pegasor Oy)                                                                                             |

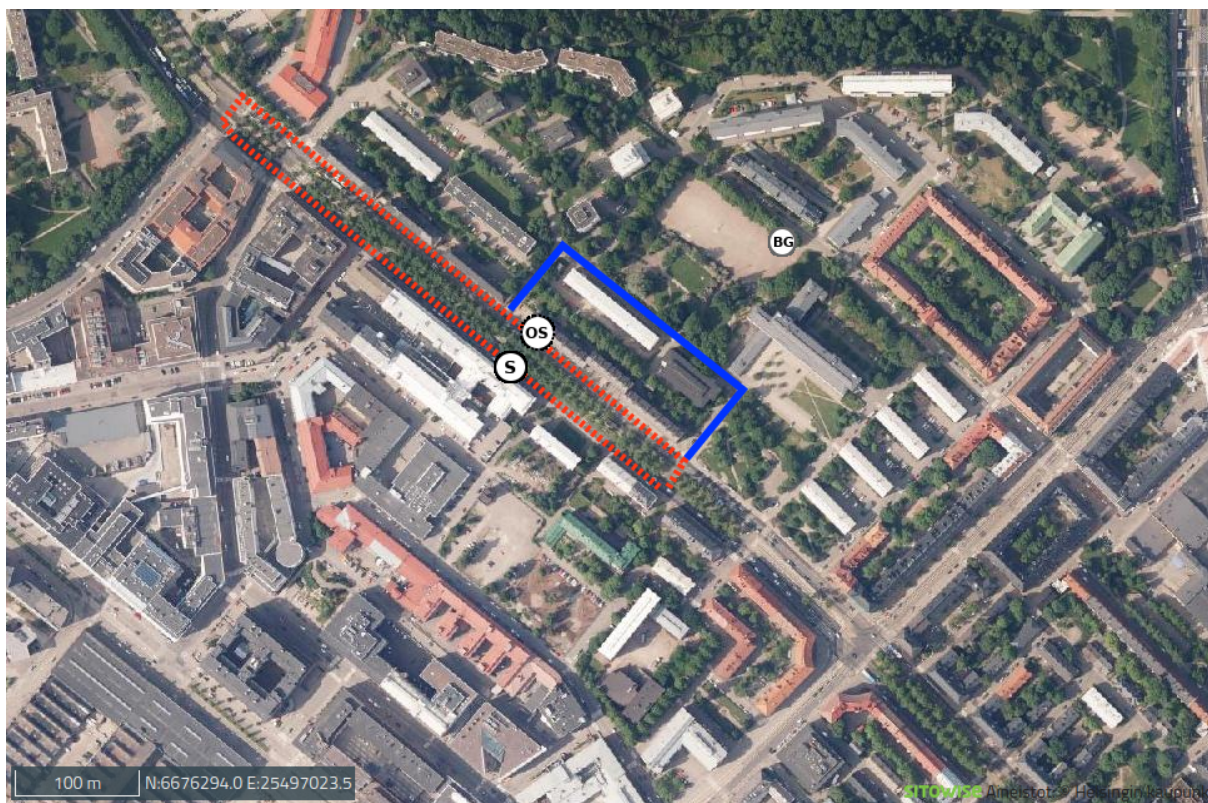

**Figure S1.** The Sniffer route: main street with a red dotted line and the side street with a blue solid line. Stationary measurement points: S = supersite, OS = opposite the supersite, BG = background. Map from <https://kartta.hel.fi>.

### S3 Simulations

#### S3.1 Model description

The chemical mechanism `salsa+simple` found in the palm repository ([https://palm.muk.uni-hannover.de/trac/browser/palm/trunk/UTIL/chemistry/gasphase\\_preproc/mechanisms/def\\_salsa%2Bsimple?rev=4416](https://palm.muk.uni-hannover.de/trac/browser/palm/trunk/UTIL/chemistry/gasphase_preproc/mechanisms/def_salsa%2Bsimple?rev=4416)).

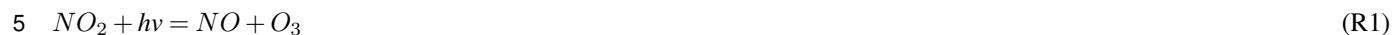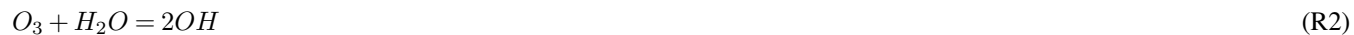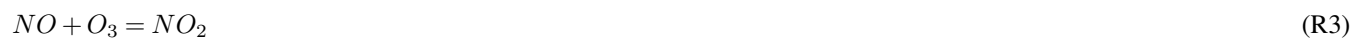

10

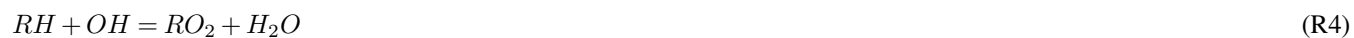

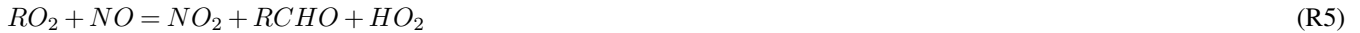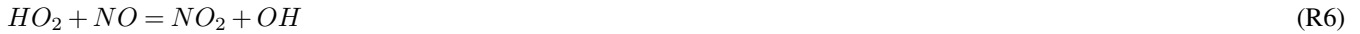

5

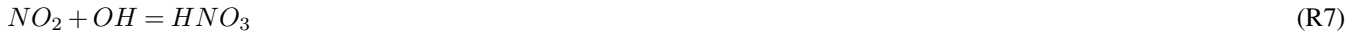

### S3.4 Air pollutant background concentrations

The trace gas emissions along the ADCHEM trajectories are taken from the Copernicus Atmosphere Monitoring Service global and regional emissions (Granier et al., 2019). For the anthropogenic emissions of carbon monoxide (CO), non-methane volatile organic compounds (NMVOC), nitrous oxides (NO<sub>x</sub>), sulphur dioxide (SO<sub>2</sub>) and NH<sub>3</sub> we use the CAMS-REG-v3.1 emission inventory for year 2015, which groups the air pollution emissions into 15 emission-type sectors. The spatial resolution is 0.05° × 0.1°. Over Finland the anthropogenic trace gas emissions are taken from an emission inventory provided by the Finnish Environment Institute (SYKE), which has been derived with the Finnish Regional Emission Scenario model FRES (Karvosenoja, 2008) and has a spatial resolution of 250 m × 250 m. From Finnish power plants and industry, emissions were provided as point sources. The anthropogenic primary particle emissions, apart those from road traffic, are estimated using the size-resolved primary particle emission inventory from Paasonen et al. (2016) with a spatial resolution of 0.5° × 0.5°. For the road traffic, primary particle emissions are estimated using the NO<sub>x</sub> emissions from the road traffic and the temperature dependent road traffic exhaust emission factors derived from measurements in Helsinki (Ripamonti et al., 2013). In order to scale the road traffic exhaust particle emissions based on the NO<sub>x</sub> emission factors an approximate NO<sub>x</sub> emission factor of 1.0 × 10<sup>-3</sup> g vehicle<sup>-1</sup> m<sup>-1</sup> was applied. This factor is estimated based on the NO<sub>x</sub> vehicle emission factors reported at an urban street in Copenhagen (0.93 × 10<sup>-3</sup> g vehicle<sup>-1</sup> m<sup>-1</sup>) and at a highway in Denmark (1.4 × 10<sup>-3</sup> g vehicle<sup>-1</sup> m<sup>-1</sup>) (Wang et al., 2010). The characteristic size-resolved road traffic primary particle emission distribution is taken from Kristensson et al. (2004). Primary particle emissions from ships traffic is parameterized based on the SO<sub>2</sub> emissions (Roldin et al., 2019). All anthropogenic emissions are corrected using monthly, weekly and hourly time profiles originally developed for the LOTOS-EUROS model (Schaap et al., 2008).

The size resolved marine sea-spray primary particle emissions are calculated using the parameterization from Mårtensson et al. (2003). The dimethyl sulphide emissions are considered using the daily CAMS-OCE global oceanic emissions with a spatial resolution of 0.5° × 0.5° (Lana et al., 2011). Global soil NO<sub>x</sub> emissions are taken from 0.5° × 0.5° resolution, monthly emission files for year 2015 (Simpson et al., 2014). The biogenic VOC emissions are modelled using a one-dimensional version of MEGAN 2.04 (Model of Emissions of Gases and Aerosols from Nature Guenther et al., 2006), which has been implemented into ADCHEM (Roldin et al., 2019).

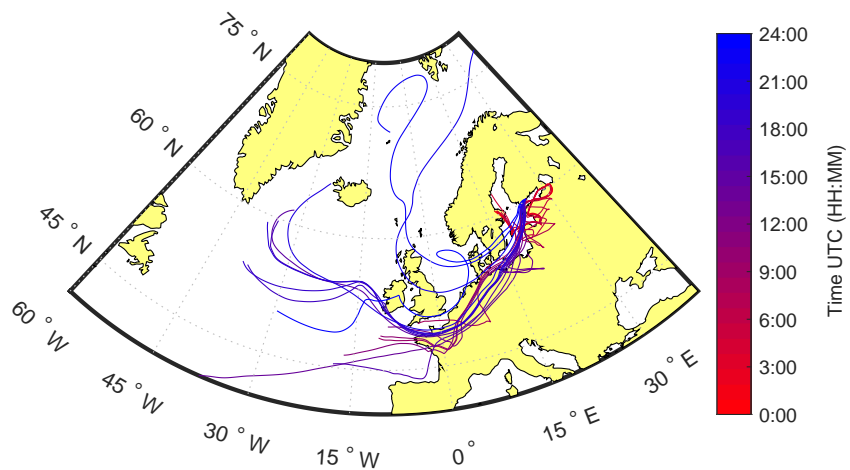

**Figure S2.** HYSPLIT seven-days-long back trajectories arriving to the supersite on 9 Jun 2017 from 00:00 UTC to 24:00 UTC

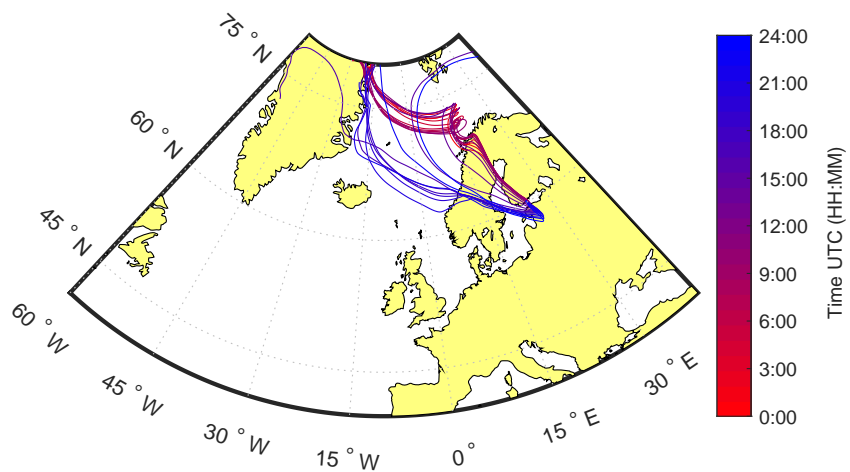

**Figure S3.** HYSPLIT seven-days-long back trajectories arriving to the supersite on 12 Dec 2017 from 00:00 UTC to 24:00 UTC

### S3.5 Air pollutant emissions

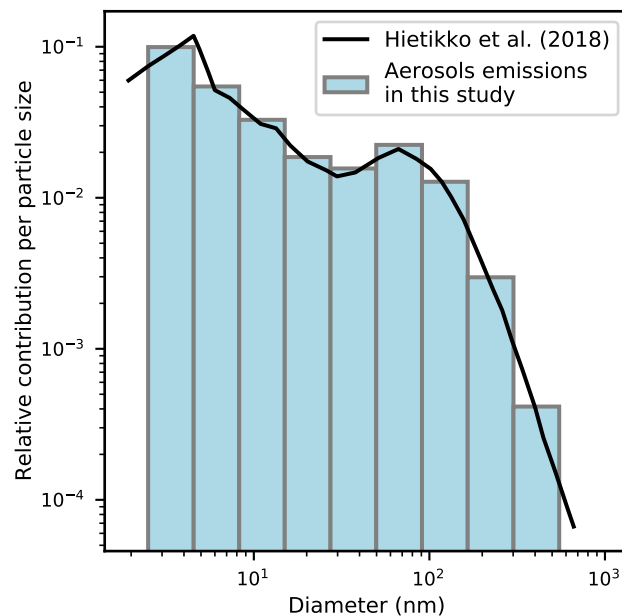

**Figure S4.** Relative contribution to the aerosol size distribution per particle size for Hietikko et al. (2018) and the traffic-combustion-related aerosol emission applied in this study.

### S4 Comparison of the modelled and observed boundary conditions

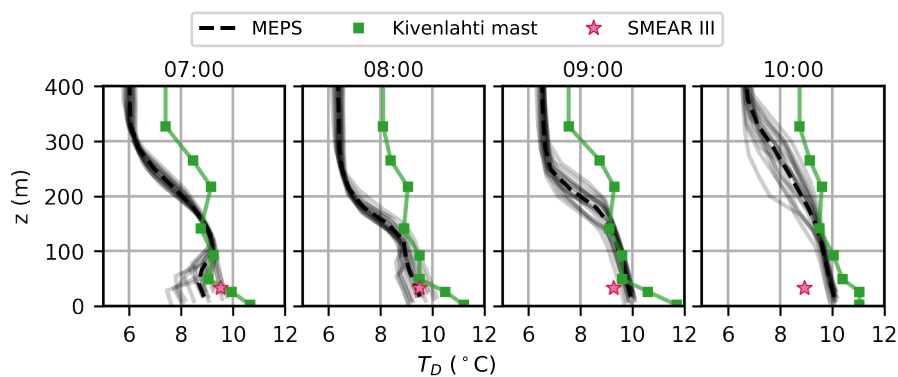

**Figure S5.** Dew-point temperature  $T_D$  (°C) on 9 Jun at local time (UTC+3). The modelled profiles at each MEPS grid point are shown by grey solid lines and their mean by a black dashed line. The observation from the Kivenlahti mast are shown by green solid squares and the interpolated profiles used as boundary conditions by a green solid line. Stars show the SMEAR III observations.

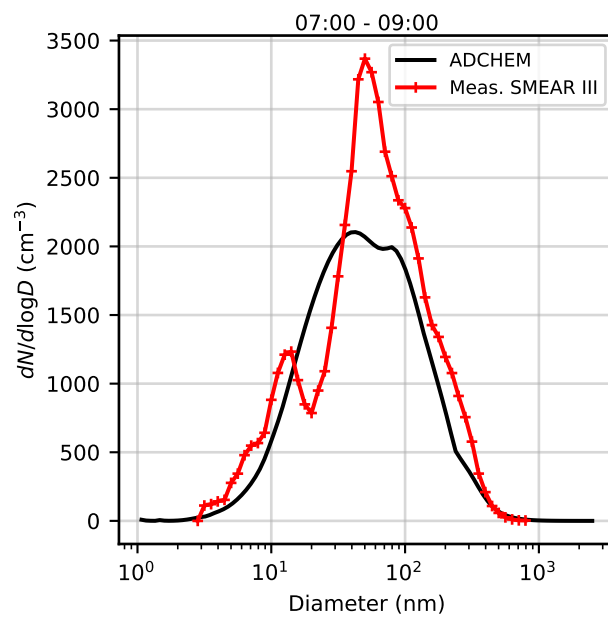

**Figure S6.** Mean modelled (black solid line) and measured aerosol size distribution at the SMEAR station (red line with crosses) on 9 Jun 2017 between 07:00-10:00 local time from 00:00 UTC to 24:00 UTC. Modelled values are from ADCHEM for a trajectory arriving in Helsinki (60° 12'N, 24° 57'E).



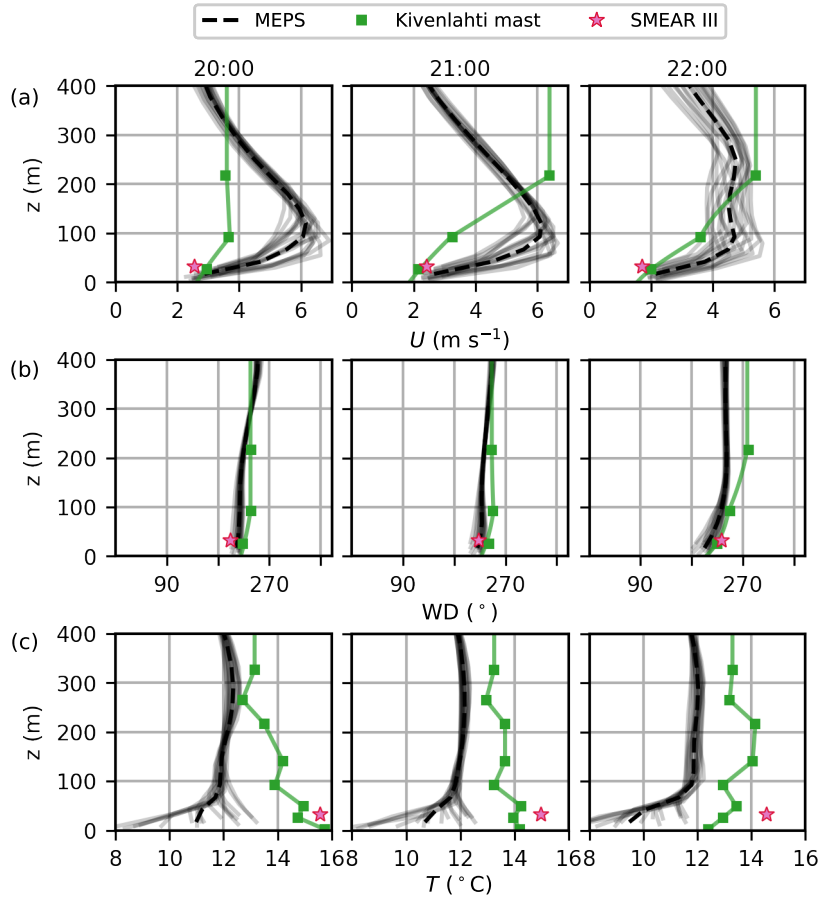

**Figure S7.** Horizontal a) wind speed  $U$  ( $\text{m s}^{-1}$ ), b) wind direction  $WD$  ( $^\circ$ ) and c) air temperature  $T$  ( $^\circ\text{C}$ ) on 9 Jun at local time (UTC+3). See Fig. S5 caption for details.

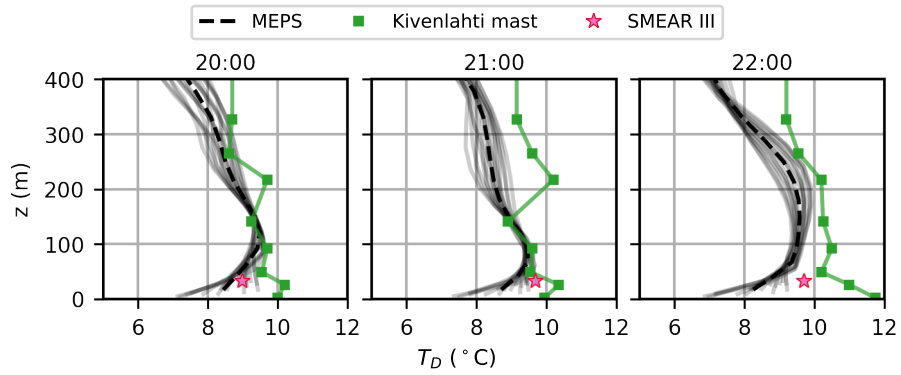

**Figure S8.** Dew-point temperature  $T_D$  ( $^\circ\text{C}$ ) on 9 Jun at local time (UTC+3). See Fig. S5 for details.

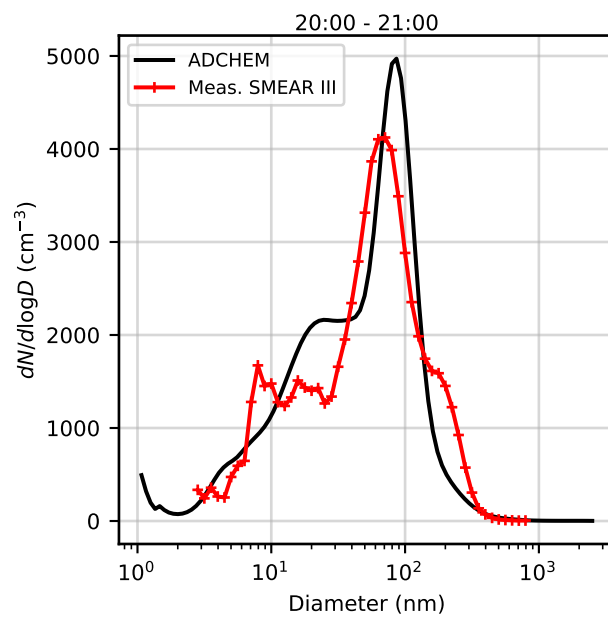

**Figure S9.** Mean modelled (black solid line) and measured aerosol size distribution at the SMEAR station (red line with crosses) on 9 Jun 2017 between 20:00-22:00 local time. Modelled values are from ADCHEM for a trajectory arriving in Helsinki (60°12'N, 24°57'E).

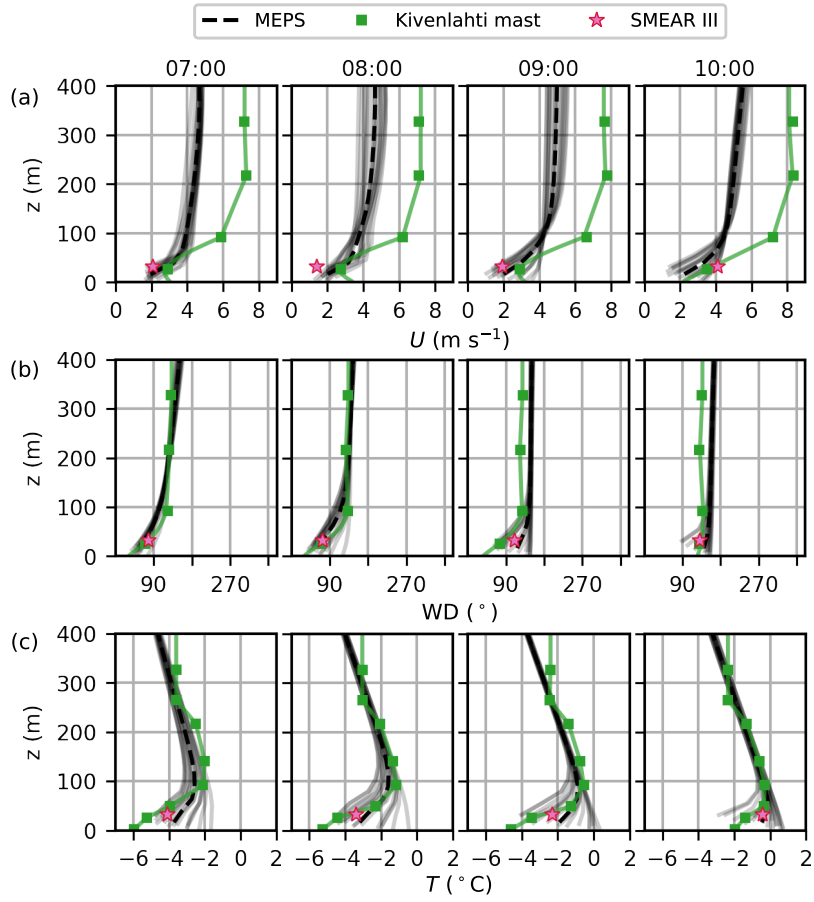

**Figure S10.** Horizontal a) wind speed  $U$  (m s<sup>-1</sup>), b) wind direction  $WD$  (°) and c) air temperature  $T$  (°C) on 12 Dec at local time (UTC+3). See Fig. S5 caption for details.

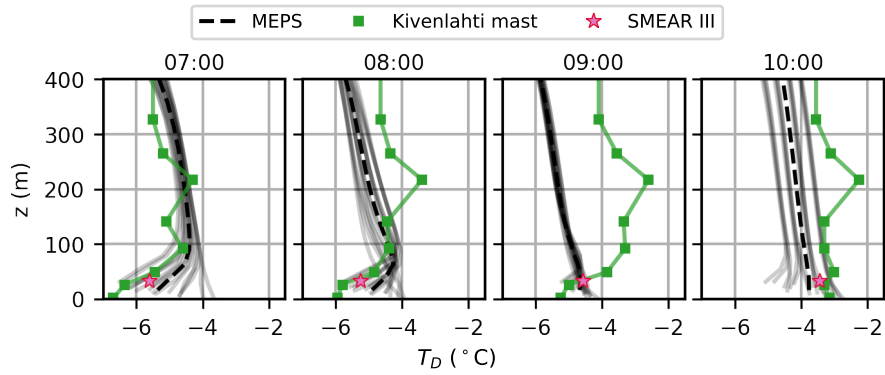

**Figure S11.** Dew-point temperature  $T_D$  (°C) on 12 Dec at local time (UTC+2). See Fig. S5 for details.

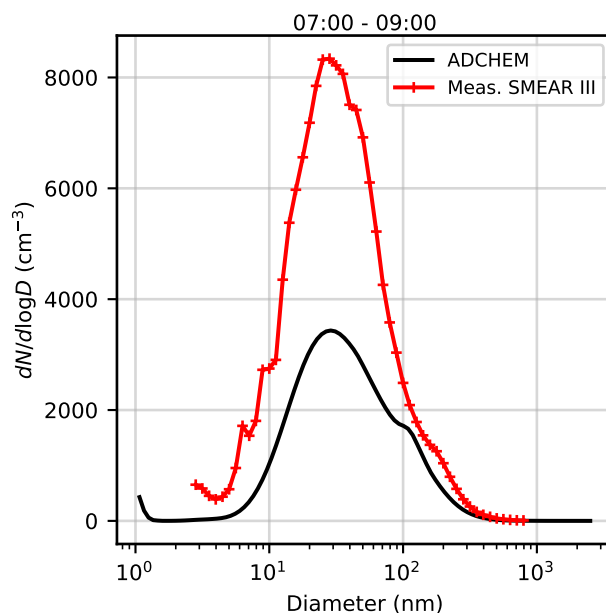

**Figure S12.** Mean modelled (black solid line) and measured aerosol size distribution at the SMEAR station (red line with crosses) on 12 Dec 2017 between 07:00-10:00 local time from 00:00 UTC to 24:00 UTC. Modelled values are from ADCHEM for a trajectory arriving in Helsinki (60° 12' N, 24° 57' E).

## S5 Evaluation of the air quality modelling results

### S5.2 Horizontal distribution of total aerosol particle number concentration

**Table S2.** Significance of differences in the model absolute error (i.e., the difference between the modelled and observed values) compared to  $M_{MET}M_{PSD}$  based on Student's t-test for the means of two independent samples.

| Simulation time     | Simulation name       | Significantly different? | <i>p</i> -value     |
|---------------------|-----------------------|--------------------------|---------------------|
| 9 Jun, 07:16–08:14  | $O_{MET}O_{PSD}$      | —*                       | —                   |
|                     | $M_{MET}O_{PSD}$      | —*                       | —                   |
|                     | $O_{WD,mast}O_{PSD}$  | —*                       | —                   |
|                     | $O_{WD,SMEAR}O_{PSD}$ | No                       | 0.039               |
| 9 Jun, 08:23–09:15  | $O_{MET}O_{PSD}$      | Yes                      | 0.80                |
|                     | $M_{MET}O_{PSD}$      | Yes                      | 0.92                |
|                     | $O_{WD,mast}O_{PSD}$  | Yes                      | 0.39                |
|                     | $O_{WD,SMEAR}O_{PSD}$ | —*                       | —                   |
| 9 Jun, 20:26–21:14  | $O_{MET}O_{PSD}$      | Yes                      | 0.34                |
| 12 Dec, 07:20–08:08 | $O_{MET}O_{PSD}$      | No                       | $2 \times 10^{-11}$ |
| 12 Dec, 08:14–09:14 | $O_{MET}O_{PSD}$      | —*                       | —                   |

\*: Variances are not homogeneous according to a Levene's test and a Student's t-test cannot be performed

**Table S3.** Model performance for the aerosol size distribution for  $M_{\text{MET}}M_{\text{PSD}}$  on 9 Jun morning. Performance measures: fractional bias (FB), normalised mean squared error (NMSE), factor of two (FAC2), normalised mean bias factor (NMBF) and normalised mean absolute error factor (NMAEF). Colours indicate whether the value fits (blue) or not (red) within the criteria in Table 6.

| Time        | Measure | Instrument | Background | Side street | Main street | Opposite supersite | Supersite |
|-------------|---------|------------|------------|-------------|-------------|--------------------|-----------|
| 07:20–08:08 | FB      | EEPS       | 0.04       | -0.85       | 0.23        | –                  | 0.36      |
|             |         | ELPI       | -0.26      | -1.32       | -0.05       | –                  | 0.20      |
|             | NMSE    | EEPS       | 3.12       | 3.30        | 1.61        | –                  | 1.06      |
|             |         | ELPI       | 1.49       | 6.76        | 1.16        | –                  | 0.72      |
|             | FAC2    | EEPS       | 0.50       | 0.12        | 0.50        | –                  | 0.50      |
|             |         | ELPI       | 0.38       | 0.00        | 0.75        | –                  | 0.62      |
|             | NMBF    | EEPS       | 0.89       | -2.45       | 0.40        | –                  | 0.27      |
|             |         | ELPI       | 0.06       | -4.58       | 0.08        | –                  | 0.14      |
|             | NMAEF   | EEPS       | 1.24       | 2.63        | 0.88        | –                  | 0.78      |
|             |         | ELPI       | 0.86       | 4.58        | 0.62        | –                  | 0.57      |
| 08:14–09:14 | FB      | EEPS       | –          | -0.75       | 0.44        | 0.15               | 0.78      |
|             |         | ELPI       | –          | -1.21       | 0.25        | 0.00               | 0.47      |
|             | NMSE    | EEPS       | –          | 2.44        | 11.09       | 4.91               | 15.64     |
|             |         | ELPI       | –          | 4.23        | 7.05        | 3.82               | 9.16      |
|             | FAC2    | EEPS       | –          | 0.12        | 0.25        | 0.50               | 0.38      |
|             |         | ELPI       | –          | 0.12        | 0.50        | 0.62               | 0.62      |
|             | NMBF    | EEPS       | –          | -1.51       | 2.34        | 0.84               | 4.09      |
|             |         | ELPI       | –          | -2.99       | 1.33        | 0.42               | 2.33      |
|             | NMAEF   | EEPS       | –          | 2.04        | 2.76        | 1.34               | 4.15      |
|             |         | ELPI       | –          | 2.99        | 1.91        | 1.24               | 2.60      |

#### S5.4 Aerosol size distribution

**Table S4.** Model performance for the aerosol size distribution for O<sub>MET</sub>OP<sub>SD</sub> on 9 Jun morning. See Table S3 for further description.

| Time        | Measure | Instrument | Background | Side street | Main street | Opposite supersite | Supersite |
|-------------|---------|------------|------------|-------------|-------------|--------------------|-----------|
| 07:20–08:08 | FB      | EEPS       | 0.07       | -0.64       | 0.46        | –                  | 0.21      |
|             |         | ELPI       | -0.42      | -1.12       | 0.23        | –                  | 0.11      |
|             | NMSE    | EEPS       | 0.19       | 2.25        | 10.32       | –                  | 5.44      |
|             |         | ELPI       | 0.86       | 3.44        | 7.74        | –                  | 4.66      |
|             | FAC2    | EEPS       | 0.62       | 0.00        | 0.12        | –                  | 0.38      |
|             |         | ELPI       | 0.50       | 0.25        | 0.25        | –                  | 0.38      |
|             | NMBF    | EEPS       | 0.07       | -1.11       | 2.11        | –                  | 0.64      |
|             |         | ELPI       | -0.68      | -2.38       | 1.42        | –                  | 0.50      |
|             | NMAEF   | EEPS       | 0.39       | 1.80        | 2.69        | –                  | 1.64      |
|             |         | ELPI       | 0.81       | 2.38        | 2.13        | –                  | 1.52      |
| 08:14–09:14 | FB      | EEPS       | –          | -0.68       | 0.45        | 0.57               | 0.13      |
|             |         | ELPI       | –          | -1.14       | 0.17        | 0.38               | -0.27     |
|             | NMSE    | EEPS       | –          | 2.33        | 11.53       | 9.65               | 3.09      |
|             |         | ELPI       | –          | 3.86        | 7.39        | 7.09               | 1.68      |
|             | FAC2    | EEPS       | –          | 0.12        | 0.25        | 0.12               | 0.50      |
|             |         | ELPI       | –          | 0.25        | 0.38        | 0.38               | 0.62      |
|             | NMBF    | EEPS       | –          | -1.33       | 2.42        | 2.50               | 0.65      |
|             |         | ELPI       | –          | -2.69       | 1.38        | 1.69               | 0.08      |
|             | NMAEF   | EEPS       | –          | 1.92        | 2.85        | 2.86               | 1.05      |
|             |         | ELPI       | –          | 2.69        | 2.02        | 2.18               | 0.77      |

**Table S5.** Model performance for the aerosol size distribution for  $M_{\text{MET}}\text{OPSD}$  on 9 Jun morning. See Table S3 for further description.

| Time        | Measure | Instrument | Background | Side street | Main street | Opposite supersite | Supersite |
|-------------|---------|------------|------------|-------------|-------------|--------------------|-----------|
| 07:20–08:08 | FB      | EEPS       | 0.27       | -0.75       | 0.27        | –                  | 0.40      |
|             |         | ELPI       | -0.12      | -1.24       | -0.10       | –                  | 0.16      |
|             | NMSE    | EEPS       | 3.58       | 2.90        | 1.52        | –                  | 1.00      |
|             |         | ELPI       | 1.62       | 6.06        | 1.10        | –                  | 0.68      |
|             | FAC2    | EEPS       | 0.50       | 0.12        | 0.50        | –                  | 0.38      |
|             |         | ELPI       | 0.38       | 0.12        | 0.62        | –                  | 0.62      |
|             | NMBF    | EEPS       | 1.14       | -2.16       | 0.40        | –                  | 0.28      |
|             |         | ELPI       | 0.20       | -4.11       | 0.08        | –                  | 0.15      |
|             | NMAEF   | EEPS       | 1.41       | 2.35        | 0.86        | –                  | 0.78      |
|             |         | ELPI       | 0.88       | 4.11        | 0.61        | –                  | 0.57      |
| 08:14–09:14 | FB      | EEPS       | –          | -0.67       | 0.46        | 0.20               | 0.81      |
|             |         | ELPI       | –          | -1.14       | 0.17        | -0.04              | 0.41      |
|             | NMSE    | EEPS       | –          | 2.27        | 11.00       | 4.83               | 15.45     |
|             |         | ELPI       | –          | 3.94        | 7.00        | 3.77               | 9.05      |
|             | FAC2    | EEPS       | –          | 0.12        | 0.25        | 0.38               | 0.12      |
|             |         | ELPI       | –          | 0.25        | 0.38        | 0.50               | 0.38      |
|             | NMBF    | EEPS       | –          | -1.37       | 2.35        | 0.87               | 4.15      |
|             |         | ELPI       | –          | -2.77       | 1.34        | 0.44               | 2.37      |
|             | NMAEF   | EEPS       | –          | 1.91        | 2.78        | 1.35               | 4.21      |
|             |         | ELPI       | –          | 2.77        | 1.93        | 1.26               | 2.64      |

**Table S6.** Model performance for the aerosol size distribution for  $O_{WD,mast}O_{PSD}$  on 9 Jun morning. See Table S3 for further description.

| Time        | Measure | Instrument | Background | Side street | Main street | Opposite supersite | Supersite |
|-------------|---------|------------|------------|-------------|-------------|--------------------|-----------|
| 07:20–08:08 | FB      | EEPS       | 0.20       | -0.73       | 0.44        | –                  | 0.27      |
|             |         | ELPI       | -0.22      | -1.21       | 0.19        | –                  | 0.18      |
|             | NMSE    | EEPS       | 1.56       | 2.62        | 8.49        | –                  | 6.31      |
|             |         | ELPI       | 0.89       | 5.23        | 6.32        | –                  | 5.39      |
|             | FAC2    | EEPS       | 0.50       | 0.12        | 0.25        | –                  | 0.38      |
|             |         | ELPI       | 0.50       | 0.25        | 0.38        | –                  | 0.38      |
|             | NMBF    | EEPS       | 0.70       | -1.86       | 1.78        | –                  | 0.88      |
|             |         | ELPI       | -0.05      | -3.59       | 1.17        | –                  | 0.72      |
|             | NMAEF   | EEPS       | 0.96       | 2.17        | 2.35        | –                  | 1.82      |
|             |         | ELPI       | 0.71       | 3.59        | 1.82        | –                  | 1.68      |
| 08:14–09:14 | FB      | EEPS       | –          | -0.62       | 0.51        | 0.58               | 0.18      |
|             |         | ELPI       | –          | -1.07       | 0.21        | 0.33               | -0.34     |
|             | NMSE    | EEPS       | –          | 2.31        | 10.85       | 6.77               | 1.41      |
|             |         | ELPI       | –          | 2.89        | 6.88        | 4.90               | 0.87      |
|             | FAC2    | EEPS       | –          | 0.00        | 0.12        | 0.25               | 0.62      |
|             |         | ELPI       | –          | 0.25        | 0.38        | 0.50               | 0.62      |
|             | NMBF    | EEPS       | –          | -0.85       | 2.43        | 1.94               | 0.31      |
|             |         | ELPI       | –          | -1.93       | 1.39        | 1.26               | -0.19     |
|             | NMAEF   | EEPS       | –          | 1.59        | 2.83        | 2.25               | 0.68      |
|             |         | ELPI       | –          | 1.93        | 1.92        | 1.71               | 0.65      |



**Table S7.** Model performance for the aerosol size distribution for  $O_{WD,SMEAR}O_{PSD}$  on 9 Jun morning. See Table S3 for further description.

| Time        | Measure | Instrument | Background | Side street | Main street | Opposite supersite | Supersite |
|-------------|---------|------------|------------|-------------|-------------|--------------------|-----------|
| 07:20–08:08 | FB      | EEPS       | 0.21       | -0.68       | 0.40        | –                  | 0.57      |
|             |         | ELPI       | -0.14      | -1.15       | 0.13        | –                  | 0.50      |
|             | NMSE    | EEPS       | 4.24       | 2.29        | 6.44        | –                  | 12.04     |
|             |         | ELPI       | 1.97       | 4.31        | 4.76        | –                  | 10.53     |
|             | FAC2    | EEPS       | 0.50       | 0.12        | 0.38        | –                  | 0.12      |
|             |         | ELPI       | 0.38       | 0.25        | 0.38        | –                  | 0.38      |
|             | NMBF    | EEPS       | 1.27       | -1.48       | 1.40        | –                  | 2.35      |
|             |         | ELPI       | 0.26       | -2.98       | 0.87        | –                  | 2.08      |
|             | NMAEF   | EEPS       | 1.56       | 1.94        | 1.95        | –                  | 3.08      |
|             |         | ELPI       | 1.00       | 2.98        | 1.50        | –                  | 2.73      |
| 08:14–09:14 | FB      | EEPS       | –          | -0.65       | 0.66        | 0.21               | 1.132     |
|             |         | ELPI       | –          | -1.12       | 0.35        | -0.02              | 0.72      |
|             | NMSE    | EEPS       | –          | 2.19        | 13.25       | 5.08               | 34.93     |
|             |         | ELPI       | –          | 3.73        | 8.46        | 3.99               | 21.75     |
|             | FAC2    | EEPS       | –          | 0.12        | 0.25        | 0.38               | 0.25      |
|             |         | ELPI       | –          | 0.25        | 0.25        | 0.50               | 0.38      |
|             | NMBF    | EEPS       | –          | -1.28       | 3.15        | 0.89               | 8.49      |
|             |         | ELPI       | –          | -2.62       | 1.89        | 0.45               | 5.21      |
|             | NMAEF   | EEPS       | –          | 1.85        | 3.47        | 1.44               | 8.50      |
|             |         | ELPI       | –          | 2.62        | 2.24        | 1.32               | 5.35      |

**Table S8.** Model performance for the aerosol size distribution for  $M_{MET}M_{PSD}$  on 9 Jun evening. See Table S3 for further description.

| Time        | Measure | Instrument | Background | Side street | Main street | Opposite supersite | Supersite |
|-------------|---------|------------|------------|-------------|-------------|--------------------|-----------|
| 20:26–21:14 | FB      | EEPS       | -0.70      | -0.54       | 0.26        | -0.10              | 1.02      |
|             |         | ELPI       | -0.58      | -0.75       | -0.15       | -0.16              | 1.20      |
|             | NMSE    | EEPS       | 0.70       | 1.24        | 0.54        | 0.46               | 7.61      |
|             |         | ELPI       | 1.77       | 1.78        | 0.14        | 0.70               | 18.96     |
|             | FAC2    | EEPS       | 0.50       | 0.38        | 0.62        | 0.38               | 0.25      |
|             |         | ELPI       | 0.38       | 0.38        | 0.88        | 0.38               | 0.12      |
|             | NMBF    | EEPS       | -0.60      | -1.00       | 0.28        | -0.17              | 3.63      |
|             |         | ELPI       | -0.96      | -1.38       | -0.05       | -0.11              | 8.89      |
|             | NMAEF   | EEPS       | 0.85       | 1.11        | 0.54        | 0.62               | 3.69      |
|             |         | ELPI       | 1.24       | 1.46        | 0.27        | 0.60               | 8.89      |

**Table S9.** Model performance for the aerosol size distribution for  $O_{MET}O_{PSD}$  on 9 Jun evening. See Table S3 for further description.

| Time        | Measure | Instrument | Background | Side street | Main street | Opposite supersite | Supersite |
|-------------|---------|------------|------------|-------------|-------------|--------------------|-----------|
| 20:26–21:14 | FB      | EEPS       | -0.15      | -0.37       | 0.34        | 0.51               | 1.03      |
|             |         | ELPI       | -0.25      | -0.72       | -0.21       | 0.26               | 1.01      |
|             | NMSE    | EEPS       | 0.48       | 1.01        | 0.42        | 1.17               | 4.57      |
|             |         | ELPI       | 0.78       | 1.59        | 0.07        | 1.27               | 12.56     |
|             | FAC2    | EEPS       | 0.50       | 0.50        | 0.75        | 0.50               | 0.25      |
|             |         | ELPI       | 0.75       | 0.50        | 0.88        | 0.62               | 0.25      |
|             | NMBF    | EEPS       | -0.01      | -0.97       | 0.27        | 0.73               | 2.68      |
|             |         | ELPI       | -0.24      | -1.35       | 0.08        | 0.82               | 6.72      |
|             | NMAEF   | EEPS       | 0.45       | 1.01        | 0.45        | 0.92               | 2.68      |
|             |         | ELPI       | 0.49       | 1.35        | 0.16        | 1.02               | 6.72      |

**Table S10.** Model performance for the aerosol size distribution for  $M_{MET}M_{PSD}$  on 7 Dec morning. See Table S3 for further description.

| Time        | Measure | Instrument | Background | Side street | Main street | Opposite supersite | Supersite |
|-------------|---------|------------|------------|-------------|-------------|--------------------|-----------|
| 07:20–08:08 | FB      | EEPS       | -0.02      | -0.65       | 0.27        | –                  | -0.34     |
|             |         | ELPI       | -0.02      | -0.83       | -0.02       | –                  | -0.54     |
|             | NMSE    | EEPS       | 0.64       | 2.71        | 3.08        | –                  | 1.70      |
|             |         | ELPI       | 1.56       | 3.38        | 4.58        | –                  | 1.41      |
|             | FAC2    | EEPS       | 0.62       | 0.38        | 0.12        | –                  | 0.50      |
|             |         | ELPI       | 0.62       | 0.38        | 0.25        | –                  | 0.38      |
|             | NMBF    | EEPS       | 0.17       | -1.93       | 0.27        | –                  | -1.04     |
|             |         | ELPI       | 0.53       | -1.45       | 0.79        | –                  | -0.33     |
|             | NMAEF   | EEPS       | 0.58       | 1.95        | 1.23        | –                  | 1.28      |
|             |         | ELPI       | 0.82       | 1.91        | 1.51        | –                  | 0.93      |
| 08:14–09:14 | FB      | EEPS       | -0.82      | -0.64       | 0.03        | -0.63              | -0.28     |
|             |         | ELPI       | -1.05      | -0.87       | -0.23       | -1.02              | -0.47     |
|             | NMSE    | EEPS       | 1.93       | 2.70        | 5.21        | 8.61               | 3.13      |
|             |         | ELPI       | 2.49       | 3.96        | 7.78        | 8.42               | 3.37      |
|             | FAC2    | EEPS       | 0.25       | 0.38        | 0.25        | 0.25               | 0.38      |
|             |         | ELPI       | 0.12       | 0.25        | 0.38        | 0.25               | 0.50      |
|             | NMBF    | EEPS       | -1.69      | -1.67       | 0.36        | -3.97              | -0.86     |
|             |         | ELPI       | -1.30      | -1.26       | 0.97        | -2.92              | -0.22     |
|             | NMAEF   | EEPS       | 1.70       | 1.68        | 1.51        | 3.98               | 1.64      |
|             |         | ELPI       | 1.82       | 2.01        | 1.98        | 3.11               | 1.25      |

**Table S11.** Model performance for the aerosol size distribution for  $O_{MET}O_{PSD}$  on 7 Dec. See Table S3 for further description.

| Time        | Measure | Instrument | Background | Side street | Main street | Opposite supersite | Supersite |
|-------------|---------|------------|------------|-------------|-------------|--------------------|-----------|
| 07:20–08:08 | FB      | EEPS       | 0.67       | 0.05        | 0.31        | –                  | 0.33      |
|             |         | ELPI       | 0.46       | -0.23       | 0.04        | –                  | 0.12      |
|             | NMSE    | EEPS       | 4.30       | 0.85        | 5.90        | –                  | 3.89      |
|             |         | ELPI       | 6.84       | 1.62        | 8.84        | –                  | 7.04      |
|             | FAC2    | EEPS       | 0.38       | 0.50        | 0.00        | –                  | 0.25      |
|             |         | ELPI       | 0.50       | 0.62        | 0.25        | –                  | 0.50      |
|             | NMBF    | EEPS       | 2.05       | 0.11        | 0.74        | –                  | 0.76      |
|             |         | ELPI       | 2.98       | 0.33        | 1.45        | –                  | 1.73      |
|             | NMAEF   | EEPS       | 2.12       | 0.60        | 1.81        | –                  | 1.40      |
|             |         | ELPI       | 3.03       | 0.81        | 2.32        | –                  | 2.05      |
| 08:14–09:14 | FB      | EEPS       | 0.08       | 0.02        | 0.38        | 0.16               | 0.16      |
|             |         | ELPI       | -0.42      | -0.38       | 0.15        | -0.12              | -0.09     |
|             | NMSE    | EEPS       | 0.42       | 0.15        | 10.69       | 4.06               | 1.38      |
|             |         | ELPI       | 0.38       | 0.48        | 16.27       | 6.92               | 1.84      |
|             | FAC2    | EEPS       | 0.75       | 0.62        | 0.25        | 0.12               | 0.38      |
|             |         | ELPI       | 0.62       | 0.50        | 0.38        | 0.12               | 0.50      |
|             | NMBF    | EEPS       | 0.04       | -0.17       | 1.75        | 0.23               | -0.06     |
|             |         | ELPI       | 0.20       | -0.01       | 2.97        | 0.56               | 0.44      |
|             | NMAEF   | EEPS       | 0.38       | 0.25        | 2.67        | 1.41               | 0.74      |
|             |         | ELPI       | 0.45       | 0.41        | 3.66        | 1.92               | 0.88      |

## S5.5 Aerosol chemical composition

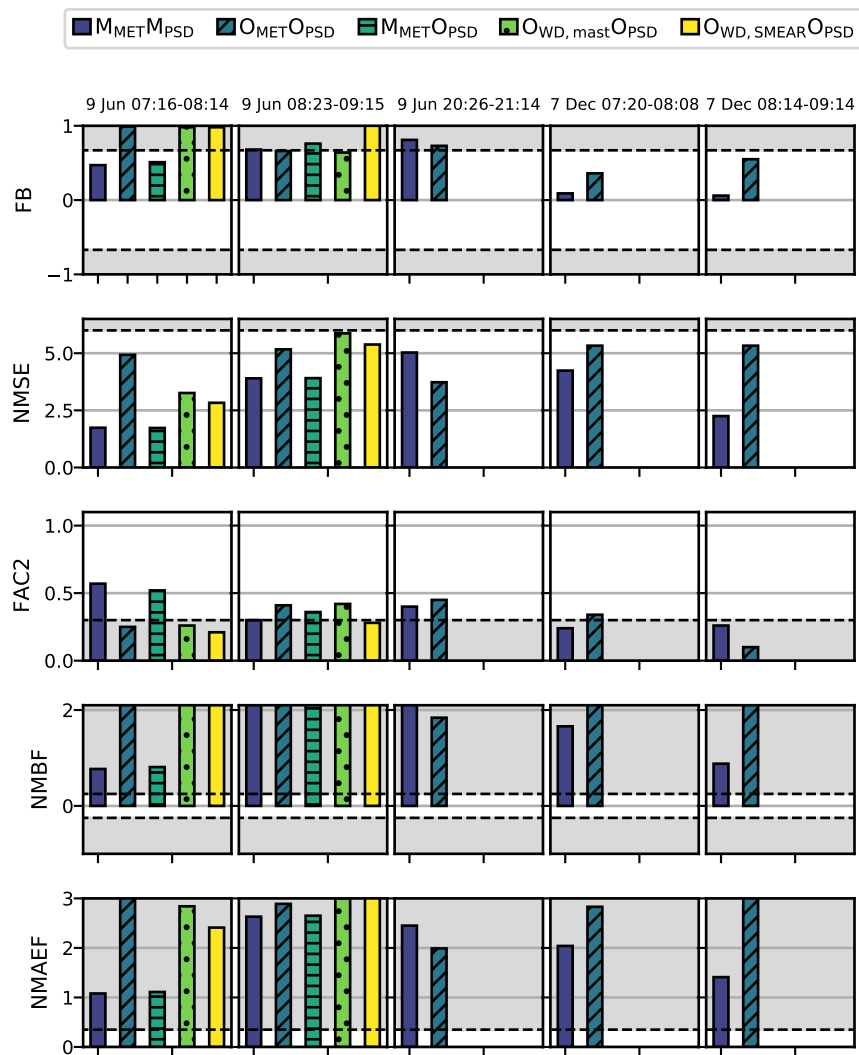

**Figure S13.** Model performance for the horizontal distribution of BC. See Table S3 for further description.

**Table S12.** Performance of the modelledin-the-modelling aerosol chemical composition at the supersite on 9 Jun evening between 20:26–21:14. See Table S3 for further description.

| Simulation name                   | Variable                     | FB    | NMSE | FAC2 | NMBF  | NMAEF |
|-----------------------------------|------------------------------|-------|------|------|-------|-------|
| M <sub>MET</sub> M <sub>PSD</sub> | SO <sub>4</sub> <sup>-</sup> | 0.44  | 0.21 | 1.00 | 0.57  | 0.57  |
|                                   | OC                           | -0.29 | 0.11 | 1.00 | -0.34 | 0.34  |
|                                   | NO <sub>3</sub> <sup>-</sup> | 1.09  | 1.69 | 0.00 | 2.39  | 2.39  |
|                                   | NH <sub>4</sub> <sup>+</sup> | 1.20  | 2.49 | 0.00 | 3.12  | 3.12  |
|                                   | BC                           | 1.17  | 2.18 | 0.00 | 2.85  | 2.85  |
|                                   | PM <sub>2.5</sub>            | 0.38  | 0.17 | 1.00 | 0.47  | 0.47  |
| O <sub>MET</sub> O <sub>PSD</sub> | SO <sub>4</sub> <sup>-</sup> | 0.81  | 0.78 | 0.00 | 1.36  | 1.36  |
|                                   | OC                           | 0.13  | 0.02 | 1.00 | 0.13  | 0.13  |
|                                   | NO <sub>3</sub> <sup>-</sup> | 1.27  | 2.73 | 0.00 | 3.51  | 3.51  |
|                                   | NH <sub>4</sub> <sup>+</sup> | 1.58  | 6.79 | 0.00 | 7.55  | 7.55  |
|                                   | BC                           | 1.48  | 4.89 | 0.00 | 5.70  | 5.70  |
|                                   | PM <sub>2.5</sub>            | 0.83  | 0.85 | 0.00 | 1.42  | 1.42  |

**Table S13.** Performance of the modelledin-the-modelling aerosol chemical composition at the supersite on 12 Dec morning between 07:20–09:14. See Table S3 for further description.

| Simulation name                   | Variable                     | FB    | NMSE  | FAC2 | NMBF  | NMAEF |
|-----------------------------------|------------------------------|-------|-------|------|-------|-------|
| M <sub>MET</sub> M <sub>PSD</sub> | SO <sub>4</sub> <sup>-</sup> | 1.21  | 2.59  | 0.00 | 3.18  | 3.18  |
|                                   | OC                           | -0.41 | 0.20  | 1.00 | -0.52 | 0.52  |
|                                   | NO <sub>3</sub> <sup>-</sup> | 1.13  | 1.89  | 0.00 | 2.60  | 2.60  |
|                                   | NH <sub>4</sub> <sup>+</sup> | 1.40  | 5.75  | 0.00 | 5.48  | 5.48  |
|                                   | BC                           | 0.87  | 1.37  | 0.33 | 1.71  | 1.71  |
|                                   | PM <sub>2.5</sub>            | 0.54  | 0.41  | 0.67 | 0.78  | 0.78  |
| O <sub>MET</sub> O <sub>PSD</sub> | SO <sub>4</sub> <sup>-</sup> | 1.84  | 21.50 | 0.00 | 22.21 | 22.21 |
|                                   | OC                           | 0.72  | 0.58  | 0.50 | 1.06  | 1.06  |
|                                   | NO <sub>3</sub> <sup>-</sup> | 0.87  | 1.03  | 0.17 | 1.57  | 1.57  |
|                                   | NH <sub>4</sub> <sup>+</sup> | 1.63  | 7.46  | 0.00 | 7.62  | 7.62  |
|                                   | BC                           | 0.11  | 0.22  | 0.67 | 0.20  | 0.46  |
|                                   | PM <sub>2.5</sub>            | 0.88  | 1.04  | 0.50 | 1.52  | 1.52  |

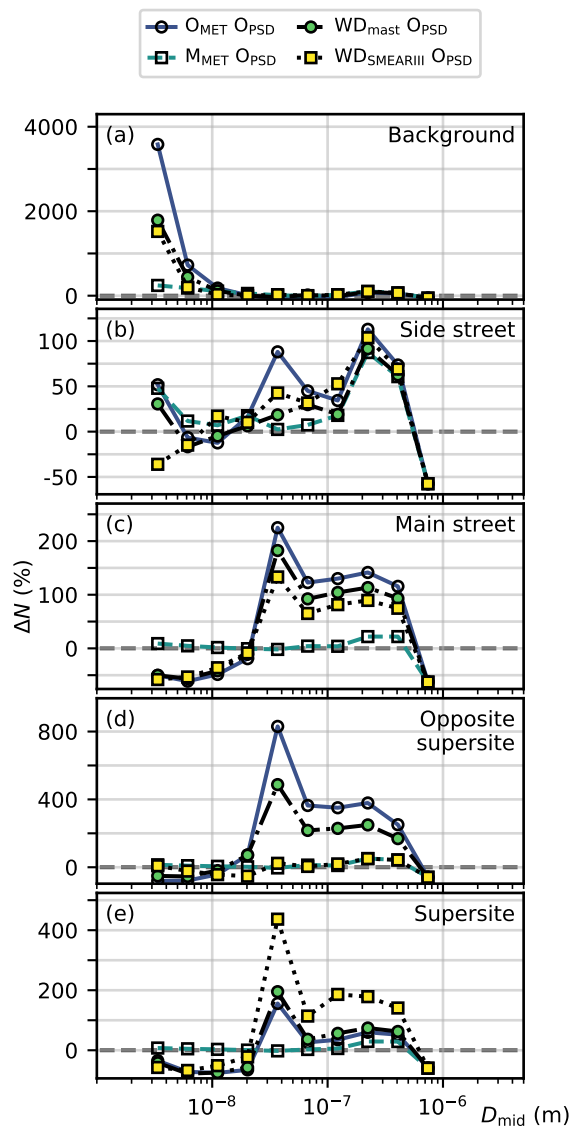

**Figure S14.** Relative difference in the aerosol number concentration  $\Delta N$  (%) compared to  $M_{\text{MET}}M_{\text{PSD}}$  to as a function of aerosol particle diameter  $D_{\text{mid}}$  (nm) at  $z = 1.5$  m on 9 Jun at 07:16–08:14. The figure shows the difference for  $O_{\text{MET}}O_{\text{PSD}}$  (solid line with empty circles),  $M_{\text{MET}}O_{\text{PSD}}$  (dashed line with empty squares),  $O_{\text{WD,mast}}O_{\text{PSD}}$  (dash-dot line with filled squares) and  $O_{\text{WD,SMEAR}}O_{\text{PSD}}$  (dotted line with filled squares).

## References

- Granier, C., Darras, S., Denier van der Gon, H., Doubalova, J., Elguindi, N., Galle, B., Gauss, M., Guevara, M., Jalkanen, J.-P., Kuenen, J., Lioussé, C., Quack, B., Simpson, D., and Sindelarova, K.: The Copernicus Atmosphere Monitoring Service global and regional emissions (April 2019 version), <https://doi.org/10.24380/d0bn-kx16>, 2019.
- 5 Guenther, A., Karl, T., Harley, P., Wiedinmyer, C., Palmer, P. I., and Geron, C.: Estimates of global terrestrial isoprene emissions using MEGAN (Model of Emissions of Gases and Aerosols from Nature), *Atmos. Chem. Phys.*, 6, 3181–3210, <https://doi.org/10.5194/acp-6-3181-2006>, 2006.
- Karvosenoja, N.: Emission scenario model for regional air pollution, Tech. rep., Finnish Environment Institute, Helsinki, Finland, 2008.
- Kristensson, A., Johansson, C., Westerholm, R., Swietlicki, E., Gidhagen, L., Wideqvist, U., and Vesely, V.: Real-world traffic emission factors of gases and particles measured in a road tunnel in Stockholm, Sweden, *Atmos. Environ.*, 38, 657–673, <https://doi.org/10.1016/j.atmosenv.2003.10.030>, 2004.
- 10 Lana, A., Bell, T. G., Simó, R., Vallina, S. M., Ballabrera-Poy, J., Kettle, A. J., Dachs, J., Bopp, L., Saltzman, E. S., Stefels, J., Johnson, J. E., and Liss, P. S.: An updated climatology of surface dimethylsulfide concentrations and emission fluxes in the global ocean, *Global Biogeochem. Cy.*, 25, <https://doi.org/10.1029/2010GB003850>, 2011.
- 15 Mårtensson, E. M., Nilsson, E. D., de Leeuw, G., Cohen, L. H., and Hansson, H.-C.: Laboratory simulations and parameterization of the primary marine aerosol production, *J. Geophys. Res.-Atmos.*, 108, <https://doi.org/10.1029/2002JD002263>, 2003.
- Paasonen, P., Kupiainen, K., Klimont, Z., Visschedijk, A., Denier van der Gon, H. A. C., and Amann, M.: Continental anthropogenic primary particle number emissions, *Atmos. Chem. Phys.*, 16, 6823–6840, <https://doi.org/10.5194/acp-16-6823-2016>, 2016.
- Ripamonti, G., Järvi, L., Mølgaard, B., Hussein, T., Nordbo, A., and Hämeri, K.: The effect of local sources on aerosol particle number size distribution, concentrations and fluxes in Helsinki, Finland, *Tellus B Chem. Phys. Meteorol.*, 65, 19786, <https://doi.org/10.3402/tellusb.v65i0.19786>, 2013.
- 20 Roldin, P., Ehn, M., Kurtén, T., Olenius, T., Rissanen, M. P., Sarnela, N., Elm, J., Rantala, P., Hao, L., Hyttinen, N., et al.: The role of highly oxygenated organic molecules in the Boreal aerosol-cloud-climate system, *Nat. Commun.*, 10, 1–15, 2019.
- Schaap, M., Timmermans, R. M., Roemer, M., Boersen, G., Builtjes, P., Sauter, F., Velders, G., and Beck, J.: The LOTOS-EUROS model: description, validation and latest developments, *Int. J. Environ. Pollut.*, 32, 270–290, 2008.
- 25 Simpson, D., Andersson, C., Christensen, J. H., Engardt, M., Geels, C., Nyiri, A., Posch, M., Soares, J., Sofiev, M., Wind, P., and Langner, J.: Impacts of climate and emission changes on nitrogen deposition in Europe: a multi-model study, *Atmos. Chem. Phys.*, 14, 6995–7017, <https://doi.org/10.5194/acp-14-6995-2014>, 2014.
- Wang, F., Ketzel, M., Ellermann, T., Wählin, P., Jensen, S. S., Fang, D., and Massling, A.: Particle number, particle mass and NO<sub>x</sub> emission factors at a highway and an urban street in Copenhagen, *Atmos. Chem. Phys.*, 10, 2745–2764, <https://doi.org/10.5194/acp-10-2745-2010>, 2010.
- 30
